# Supplementary material for: Chemical composition, antioxidant and hepatoprotective activities of methanol extracts from leaves of Terminalia bellirica and Terminalia sericea (Combretaceae)
Source: PeerJ. 2019 Feb 27;7:e6322. doi: 10.7717/peerj.6322 (PMC6397638; doi:10.7717/peerj.6322)
Supplement: Supplemental Information 1 [file peerj-07-6322-s001.xlsx]

## Sheet: T. sericea_DPPH
Sample	Conc [µg/mL]	Sample absorbance			Blank	Sample absorbance-Blank			Inhibition %			DPPH	Mean	SD
T. sericea_1	0.5	0.0699	0.0697	0.0683	0.0465	0.0234	0.0232	0.0218	95.3026	95.3427	95.6238	0.498147	95.423	0.175005
	0.25	0.069	0.0752	0.067	0.0448	0.0242	0.0304	0.0222	95.142	93.8974	95.5435		94.861	0.858284
	0.125	0.0691	0.0756	0.0669	0.0434	0.0257	0.0322	0.0235	94.8409	93.536	95.2825		94.5531	0.908094
	0.0625	0.0676	0.075	0.0671	0.0426	0.025	0.0324	0.0245	94.9814	93.4959	95.0818		94.5197	0.888052
	0.03125	0.0687	0.076	0.068	0.0423	0.0264	0.0337	0.0257	94.7004	93.2349	94.8409		94.2587	0.889411
	0.015625	0.0866	0.0938	0.0794	0.0415	0.0451	0.0523	0.0379	90.9464	89.5011	92.3918		90.9464	1.44536
	0.0078125	0.2368	0.2534	0.2212	0.0418	0.195	0.2116	0.1794	60.8549	57.5226	63.9865		60.788	3.2325
	0.00390625	0.3849	0.3987	0.3679	0.0415	0.3434	0.3572	0.3264	31.0645	28.2942	34.4771		31.2786	3.09701
	0.00195312	0.4745	0.4765	0.4562	0.0419	0.4326	0.4346	0.4143	13.1581	12.7566	16.8317		14.2488	2.24585
	0.000976562	0.5355	0.5372	0.5082	0.042	0.4935	0.4952	0.4662	0.932792	0.59153	6.41311		2.64581	3.26703
	0.000488281	0.551	0.551	0.5304	0.0421	0.5089	0.5089	0.4883	-2.15867	-2.15867	1.97666		-0.780224	2.38754
	0.000244141	0.5835	0.5681	0.5603	0.0406	0.5429	0.5275	0.5197	-8.98397	-5.8925	-4.3267		-6.40106	2.36992
Sample	Conc [µg/mL]	Sample absorbance			Blank	Sample absorbance-Blank			Inhibition %				Mean	SD
T. sericea_2	0.5	0.0778	0.0798	0.0777	0.0505	0.0273	0.0293	0.0272	94.5197	94.1182	94.5398		94.3925	0.237807
	0.25	0.0805	0.0744	0.0817	0.0479	0.0326	0.0265	0.0338	93.4557	94.6803	93.2148		93.7836	0.785813
	0.125	0.0759	0.0717	0.079	0.0461	0.0298	0.0256	0.0329	94.0178	94.861	93.3955		94.0914	0.735484
	0.0625	0.0735	0.07	0.0754	0.0435	0.03	0.0265	0.0319	93.9777	94.6803	93.5963		94.0847	0.549883
	0.03125	0.0732	0.0685	0.0734	0.0448	0.0284	0.0237	0.0286	94.2989	95.2424	94.2587		94.6	0.556681
	0.015625	0.1002	0.1036	0.085	0.0451	0.0551	0.0585	0.0399	88.939	88.2565	91.9903		89.7286	1.98821
	0.0078125	0.2595	0.2779	0.2436	0.0437	0.2158	0.2342	0.1999	56.6794	52.9857	59.8713		56.5121	3.44581
	0.00390625	0.4056	0.3989	0.3793	0.0427	0.3629	0.3562	0.3366	27.15	28.495	32.4295		29.3582	2.74359
	0.00195312	0.4827	0.4842	0.4694	0.0447	0.438	0.4395	0.4247	12.0741	11.773	14.744		12.8637	1.63534
	0.000976562	0.5423	0.5345	0.5271	0.0443	0.498	0.4902	0.4828	0.0294448	1.59525	3.08075		1.56848	1.52583
	0.000488281	0.5663	0.5525	0.5593	0.0444	0.5219	0.5081	0.5149	-4.76834	-1.99808	-3.36313		-3.37652	1.38518
	0.000244141	0.5769	0.5744	0.5669	0.0437	0.5332	0.5307	0.5232	-7.03675	-6.53489	-5.02931		-6.20032	1.0447
Sample	Conc [µg/mL]	Sample absorbance			Blank	Sample absorbance-Blank			Inhibition %				Mean	SD
T. sericea_3	0.5	0.0709	0.0688	0.0709	0.0467	0.0242	0.0221	0.0242	95.142	95.5636	95.142		95.2825	0.243389
	0.25	0.071	0.0749	0.0702	0.0473	0.0237	0.0276	0.0229	95.2424	94.4595	95.403		95.0349	0.504796
	0.125	0.0694	0.0755	0.0685	0.047	0.0224	0.0285	0.0215	95.5033	94.2788	95.684		95.1554	0.764498
	0.0625	0.0665	0.0725	0.0655	0.0439	0.0226	0.0286	0.0216	95.4632	94.2587	95.6639		95.1286	0.760005
	0.03125	0.0694	0.0733	0.0672	0.0428	0.0266	0.0305	0.0244	94.6602	93.8773	95.1018		94.5465	0.620144
	0.015625	0.0975	0.1188	0.0936	0.0415	0.056	0.0773	0.0521	88.7583	84.4825	89.5412		87.594	2.72295
	0.0078125	0.2815	0.2975	0.2678	0.0418	0.2397	0.2557	0.226	51.8816	48.6697	54.6318		51.7277	2.98403
	0.00390625	0.4144	0.4123	0.3934	0.0413	0.3731	0.371	0.3521	25.1024	25.5239	29.318		26.6481	2.32178
	0.00195312	0.4987	0.4957	0.4791	0.0441	0.4546	0.4516	0.435	8.74174	9.34397	12.6763		10.254	2.11929
	0.000976562	0.5359	0.5294	0.5133	0.0422	0.4937	0.4872	0.4711	0.892642	2.19748	5.42946		2.83986	2.33563
	0.000488281	0.5646	0.5573	0.5391	0.0414	0.5232	0.5159	0.4977	-5.02931	-3.56387	0.0896668		-2.8345	2.63628
	0.000244141	0.5826	0.5459	0.5389	0.0424	0.5402	0.5035	0.4965	-8.44196	-1.07465	0.330554		-3.06202	4.71184

## Sheet: T. bellirica_DPPH
Sample	Conc [µg/mL]	Sample absorbance			Blank	Sample absorbance-Blank			Inhibition %			DPPH	Mean	SD
T. bellirica_1	0.25	0.1138	0.1089	0.1028	0.0718	0.042	0.0371	0.031	91.5687	92.5524	93.7769	0.498147	92.6327	1.10628
	0.125	0.099	0.0922	0.0977	0.0589	0.0401	0.0333	0.0388	91.9502	93.3152	92.2111		92.4922	0.724627
	0.0625	0.0887	0.0825	0.0873	0.0562	0.0325	0.0263	0.0311	93.4758	94.7204	93.7569		93.9844	0.652752
	0.03125	0.0823	0.0778	0.0818	0.0482	0.0341	0.0296	0.0336	93.1546	94.058	93.255		93.4892	0.495124
	0.015625	0.0779	0.0743	0.078	0.0467	0.0312	0.0276	0.0313	93.7368	94.4595	93.7167		93.971	0.423153
	0.0078125	0.0869	0.0794	0.0869	0.0461	0.0408	0.0333	0.0408	91.8096	93.3152	91.8096		92.3115	0.869247
	0.00390625	0.2355	0.2206	0.2361	0.0438	0.1917	0.1768	0.1923	61.5174	64.5084	61.3969		62.4742	1.7627
	0.00195312	0.3938	0.3707	0.3861	0.0438	0.35	0.3269	0.3423	29.7396	34.3768	31.2853		31.8005	2.36114
	0.000976562	0.4983	0.4739	0.4826	0.0443	0.454	0.4296	0.4383	8.86218	13.7603	12.0139		11.5455	2.48244
	0.000488281	0.54	0.5314	0.5268	0.042	0.498	0.4894	0.4848	0.0294373	1.75584	2.67927		1.48818	1.34504
	0.000244141	0.5688	0.5567	0.5645	0.0436	0.5252	0.5131	0.5209	-5.43079	-3.00179	-4.56759		-4.33339	1.23132
	0.00012207	0.5839	0.577	0.5724	0.0448	0.5391	0.5322	0.5276	-8.22114	-6.83601	-5.91258		-6.98991	1.16195
Sample	Conc [µg/mL]	Sample absorbance			Blank	Sample absorbance-Blank			Inhibition %				Mean	SD
T. bellirica_2	0.25	0.087	0.0834	0.0832	0.0563	0.0307	0.0271	0.0269	93.8372	94.5598	94.6		94.3323	0.429298
	0.125	0.0865	0.0925	0.084	0.0471	0.0394	0.0454	0.0369	92.0907	90.8862	92.5925		91.8565	0.87694
	0.0625	0.0846	0.0907	0.08	0.0462	0.0384	0.0445	0.0338	92.2914	91.0669	93.2148		92.1911	1.07749
	0.03125	0.2642	0.2621	0.2422	0.0437	0.2205	0.2184	0.1985	55.7359	56.1575	60.1523		57.3486	2.43723
	0.015625	0.4234	0.4395	0.396	0.0439	0.3795	0.3956	0.3521	23.8176	20.5856	29.318		24.5738	4.41502
	0.0078125	0.498	0.4849	0.4647	0.0415	0.4565	0.4434	0.4232	8.36032	10.9901	15.0451		11.4652	3.36762
	0.00390625	0.545	0.5148	0.4903	0.0418	0.5032	0.473	0.4485	-1.01443	5.04804	9.96627		4.66663	5.50028
	0.00195312	0.5448	0.5455	0.5036	0.0414	0.5034	0.5041	0.4622	-1.05457	-1.19509	7.21608		1.65547	4.81614
	0.000976562	0.5696	0.5238	0.5249	0.0419	0.5277	0.4819	0.483	-5.93265	3.26142	3.0406		0.123121	5.24562
	0.000488281	0.5665	0.5612	0.5145	0.0416	0.5249	0.5196	0.4729	-5.37058	-4.30664	5.06811		-1.53637	5.74433
	0.000244141	0.57	0.5464	0.5328	0.0421	0.5279	0.5043	0.4907	-5.9728	-1.23525	1.49487		-1.90439	3.77854
	0.00012207	0.5749	0.5325	0.4708	0.0424	0.5325	0.4901	0.4284	-6.89622	1.61531	14.0012		2.90677	10.5084
Sample	Conc [µg/mL]	Sample absorbance			Blank	Sample absorbance-Blank			Inhibition %				Mean	SD
T. bellirica_3	0.25	0.1201	0.1221	0.1203	0.0821	0.038	0.04	0.0382	92.3717	91.9702	92.3316		92.2245	0.221123
	0.125	0.1004	0.0965	0.1006	0.0685	0.0319	0.028	0.0321	93.5963	94.3792	93.5561		93.8438	0.464033
	0.0625	0.084	0.0823	0.0865	0.0574	0.0266	0.0249	0.0291	94.6602	95.0015	94.1583		94.6067	0.424104
	0.03125	0.077	0.074	0.0782	0.0508	0.0262	0.0232	0.0274	94.7405	95.3427	94.4996		94.861	0.434276
	0.015625	0.0722	0.0684	0.0735	0.049	0.0232	0.0194	0.0245	95.3427	96.1056	95.0818		95.51	0.532003
	0.0078125	0.09	0.0855	0.0909	0.0456	0.0444	0.0399	0.0453	91.087	91.9903	90.9063		91.3279	0.580771
	0.00390625	0.2313	0.2119	0.2281	0.0477	0.1836	0.1642	0.1804	63.1434	67.0378	63.7858		64.6557	2.08787
	0.00195312	0.3778	0.3634	0.3656	0.0444	0.3334	0.319	0.3212	33.0719	35.9626	35.521		34.8519	1.5572
	0.000976562	0.4547	0.4671	0.4688	0.0455	0.4092	0.4216	0.4233	17.8555	15.3663	15.025		16.0823	1.54512
	0.000488281	0.5042	0.5157	0.5097	0.0438	0.4604	0.4719	0.4659	7.57742	5.26887	6.47333		6.43987	1.15464
	0.000244141	0.531	0.5445	0.5507	0.0447	0.4863	0.4998	0.506	2.37814	-0.331896	-1.57651		0.156578	2.02207
	0.00012207	0.55	0.5621	0.5556	0.0454	0.5046	0.5167	0.5102	-1.29547	-3.72447	-2.41963		-2.47986	1.21562

## Sheet: FRAP
FRAP
	1st					FRAP	2nd					FRAP	3rd					FRAP	FRAP (mean)	FRAP
Plant name	Sample			B	ABS-B	100 µg	Sample			B	ABS-B	100 µg	Sample			B	ABS-B	100 µg	100 µg	mM FeSO4/mg extract	SD
T. Bellirica	2.161	2.1515	2.1638	0.1406	2.01817	1.93036	2.1638	2.2036	2.1386	0.1434	2.02527	1.93731	2.1523	2.1187	2.1511	0.1431	1.9976	1.91021	1.92596	19.2596	0.140738
T. sericea	2.1726	2.187	2.1652	0.2812	1.89373	1.80848	2.157	2.2109	2.1867	0.2734	1.91147	1.82585	2.1499	2.2051	2.1764	0.2648	1.91233	1.8267	1.82034	18.2034	0.102817
													FeSO4 standard
													Conc	ABS (mean)
													1	1.12813
													0.9	0.945883
													0.8	0.755767
													0.7	0.76705
													0.6	0.655133
													0.5	0.594867
													0.4	0.483767
													0.3	0.327617
													0.2	0.2586
													0.1	0.17155
