# Supplementary material for: Chemical composition, antioxidant and hepatoprotective activities of methanol extracts from leaves of Terminalia bellirica and Terminalia sericea (Combretaceae)
Source: PeerJ. 2019 Feb 27;7:e6322. doi: 10.7717/peerj.6322 (PMC6397638; doi:10.7717/peerj.6322)
Supplement: Supplemental Information 2 [file peerj-07-6322-s002.xlsx]

## Sheet: ALT
Control	D-GalN	TS 200	TS 100	TB 100	TB200	Silymarin
46.3	53.4*	51.9	41.8	46.3	51.9	41.4
19.8	65.6	25.5	63.8*	34.7	71.40*	43.1
33	67.3	61.7*	49.9	52.5	53.2	51.4
21.3	56.6	36	35.2	37.3	42.5	54.0*
15.5	71.1	57.6	46.1	58.10*	55.7	41.8
28.5	67.2	46.2	40.5	45.15	44.52	41.2

## Sheet: AST
Control	D-GalN	TS 100	TS 200	TB 100	TB 200	Silymarin
184	244	227	223	235	206	214
195	240	242	233	198	246.*	233.0*
165	242	240	190	237	225	227
177	265	233	215	301.0*	237	202
177	242	239	208	250	226	232.0*
170	250	235	220	230	229	215

## Sheet: Total Bilirubin
Control	D-GalN	TS 100	TS 200	TB 100	TB 200	Silymarin
2.21*	2.42	2.1	1.71	1.71	1.32	1.32
1.93	3.02	2.86	1.01	1.88	1.68	1.51
1.71	2.52	1.54	0.95	1.74	1.29	1.29
1.62	2.3	2.24	0.76	1.62	1.43	1.57
1.18	2.74	2.18	1.76	1.74	2.27*	1.51
1.71	3.1	2.8	1.1	1.7	1.6	1.4

## Sheet: MDA
Control	D-GalN	TS 100	TS 200	TB 100	TB 200	Silymarin
124	154	133	106	172.*	135	205.*
124	153	197.*	164.*	137	192	118
120	155	136	144	147	182	150
124	154	133	106	172.*	135	205.*
124	153	197.*	164.*	137	192	118
125	155	136	144	147	182	150

## Sheet: TAC
Control	D-GalN	TS 100	TS 200	TB 100	TB 200	Silymarin
8.01	7.16	7.73	7.84	7.14	5.89*	7.88
7.96	7.19	7.63	7.96	7.89	7.38	7.98
7.88*	7.18	7.61	7.09	7.34	8.03	8.06
8.01	7.16	7.73	7.84	7.14	6.89	7.88
7.96	7.39*	7.63	7.96	7.89	7.38	7.98
7.88*	7.18	7.61	7.09	7.34	8.03	8.06

## Sheet: Bcl-2
Control	D-GalN	TS 100	TS 200	TB 100	TB 200	Silymarin
26	14	12	16	18	20	15
25	11	17	18	16	11	18
23	8	18	14	12	22	16
24	9	14	17	15	16	19
27	10	11	15	14	19	20
25	10.4	14.4	16	15	17.6	17.6
